# Supplementary material for: Google AdWords and Facebook Ads for Recruitment of Pregnant Women into a Prospective Cohort Study With Long-Term Follow-Up
Source: Springer Nature journal article supplement (doi:10.1007/s10995-019-02797-2), 2019-06-20
Supplement: MOESM1 [file 16838326]

## eAppendix – Advertisements used for PRIDE Study recruitment

### Google AdWords - Desktop

**Ben je net zwanger? - Doe mee met onderzoek**

**Adv.** [www.zwangerschapsonderzoek.nl](http://www.zwangerschapsonderzoek.nl)

Landelijk onderzoek naar de gezondheid van vrouw en kind tijdens zwangerschap

### Google AdWords - Mobile

**Ben je net zwanger? - Doe mee met onderzoek**

**Adv.** [www.zwangerschapsonderzoek.nl](http://www.zwangerschapsonderzoek.nl)

Landelijk onderzoek naar de gezondheid van vrouw en kind tijdens zwangerschap

### Facebook Ads - Desktop

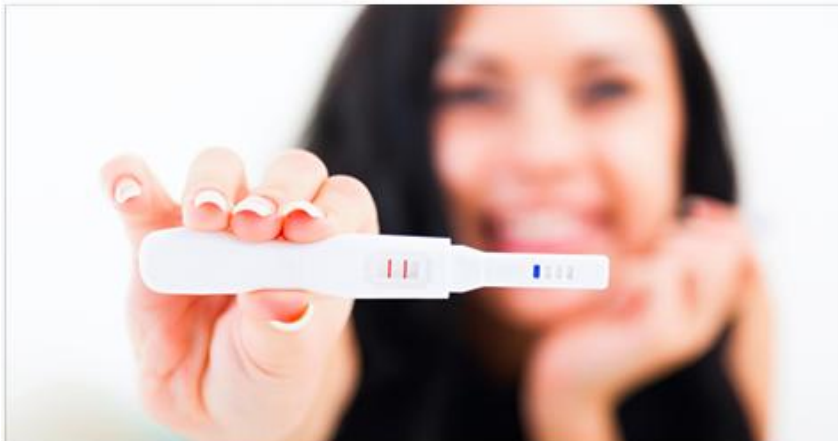

#### Onderzoek onder zwangere vrouwen

Voor een landelijk onderzoek naar de gezondheid van vrouw en kind tijdens de zwangerschap zoeken we vrouwen die net zwanger zijn (minder dan 16 weken).

ZWANGERSCHAPSONDERZOEK.NL

[Meer informatie](#)

### Facebook Ads - Mobile

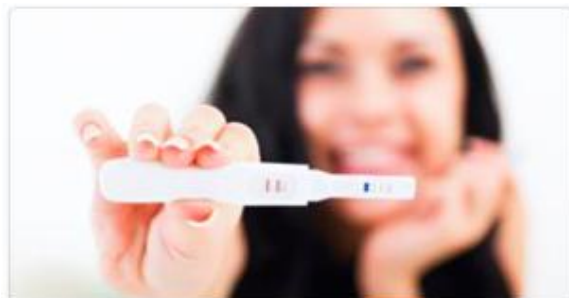

#### Onderzoek onder zwangere vrouwen

[zwangerschapsonderzoek.nl](http://zwangerschapsonderzoek.nl)

[Meer informatie](#)
